# Supplementary material for: Marine probiotics: increasing coral resistance to bleaching through microbiome manipulation
Source: PubMed Central journal article supplement (PMC6461899; doi:10.1038/s41396-018-0323-6), 2018-12-05

# Significant ASVs 1, 9 and 26 days at 26° and 30° Celsius

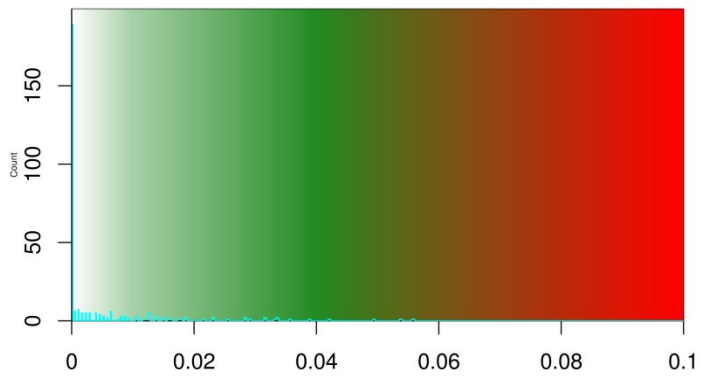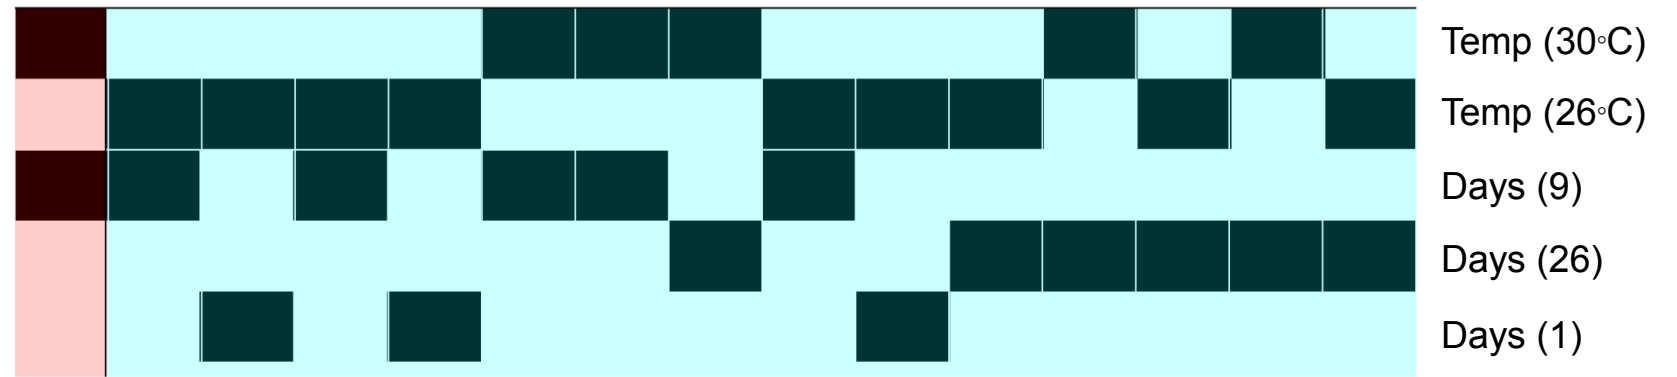

ASV relative abundance

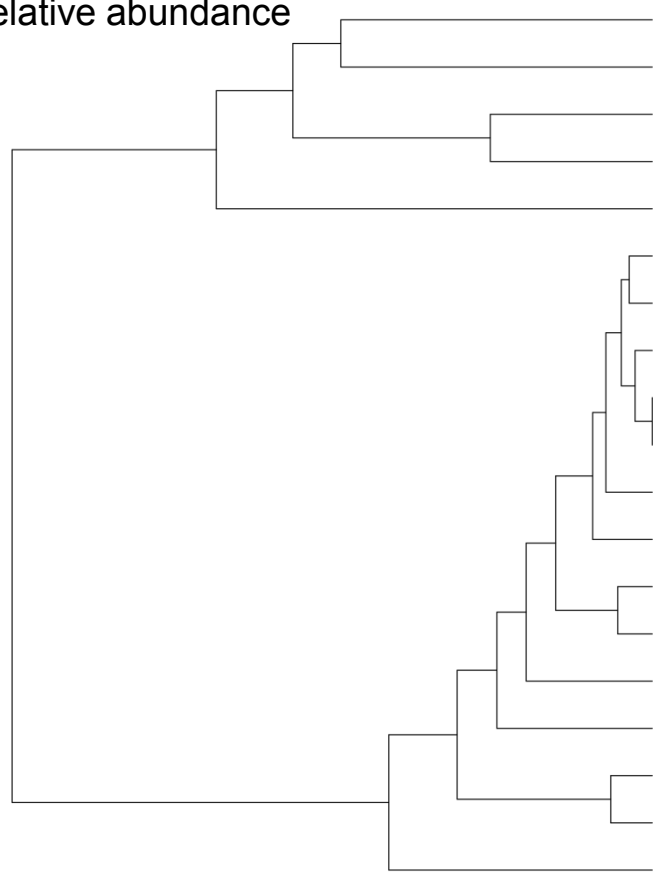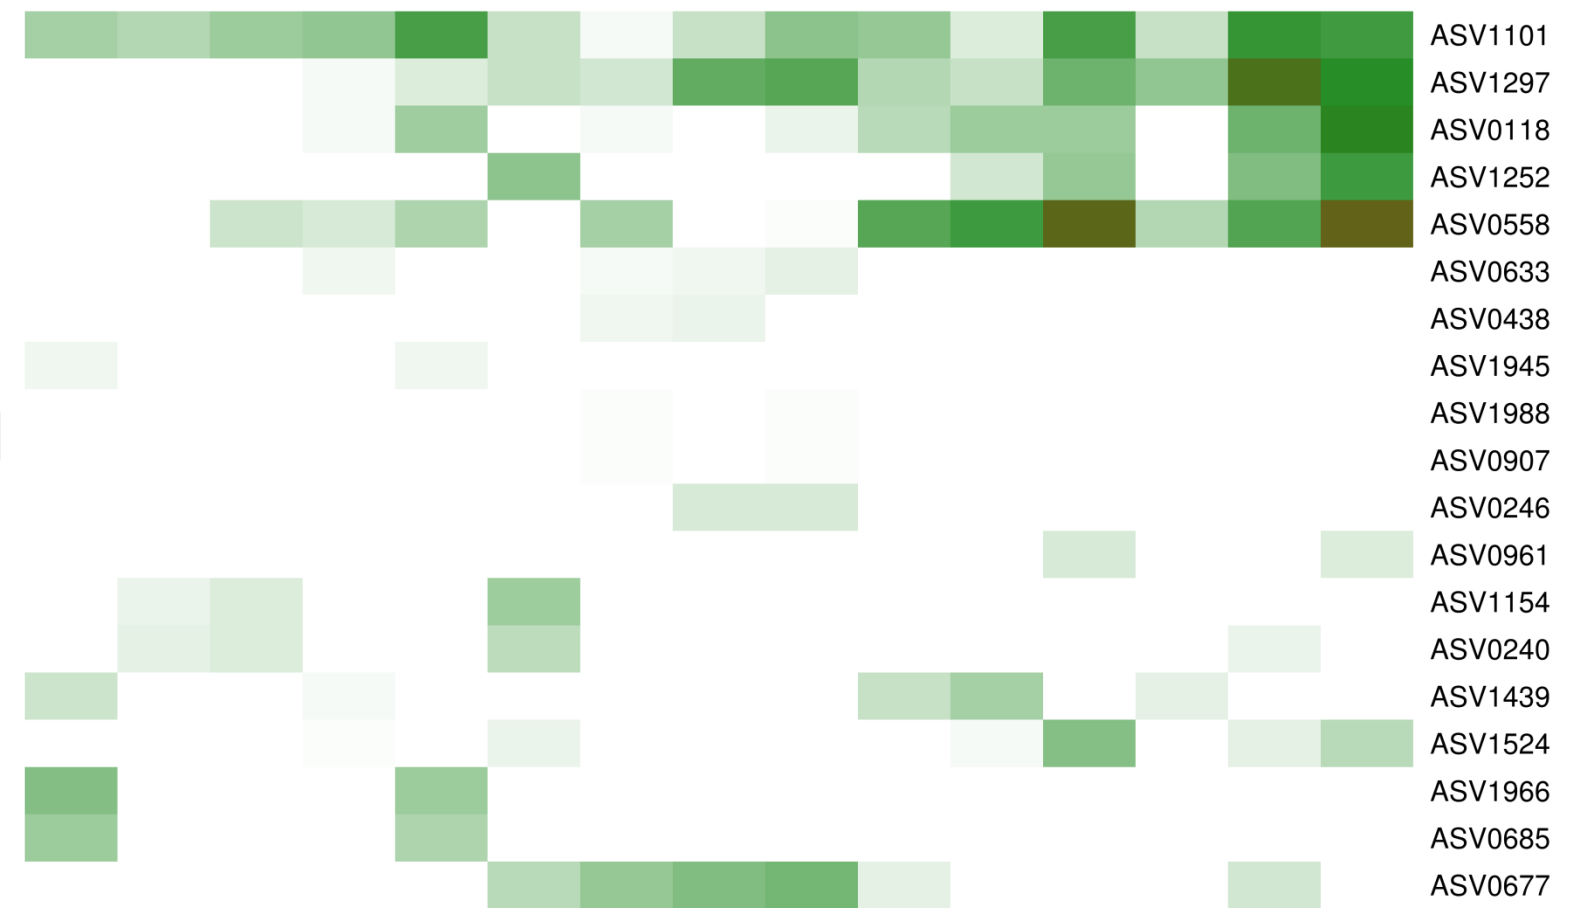

Supplement: 41396_2018_323_MOESM7_ESM.pdf [file 41396_2018_323_MOESM7_ESM.pdf]
