# Supplementary material for: Marine probiotics: increasing coral resistance to bleaching through microbiome manipulation
Source: PubMed Central journal article supplement (PMC6461899; doi:10.1038/s41396-018-0323-6), 2018-12-05
Supplement: 41396_2018_323_MOESM10_ESM.pdf [file 41396_2018_323_MOESM10_ESM.pdf]

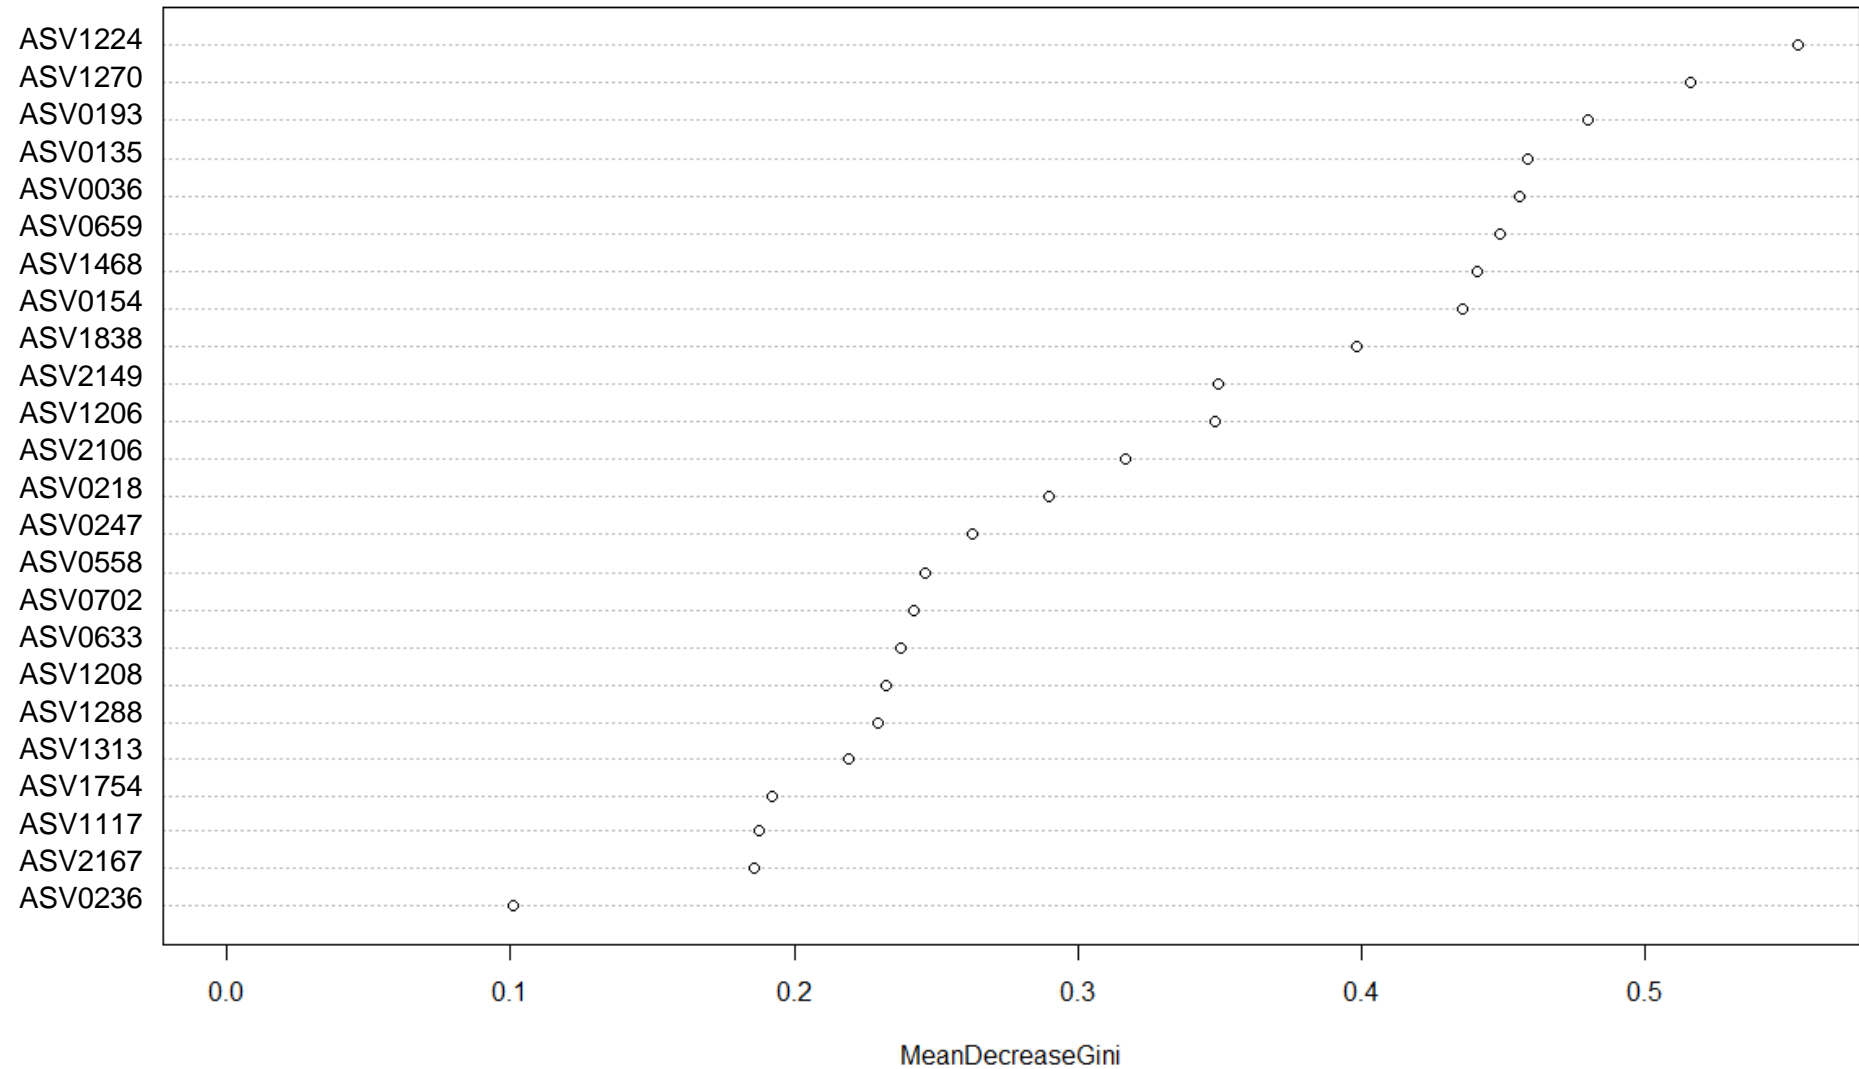

# rf\_26

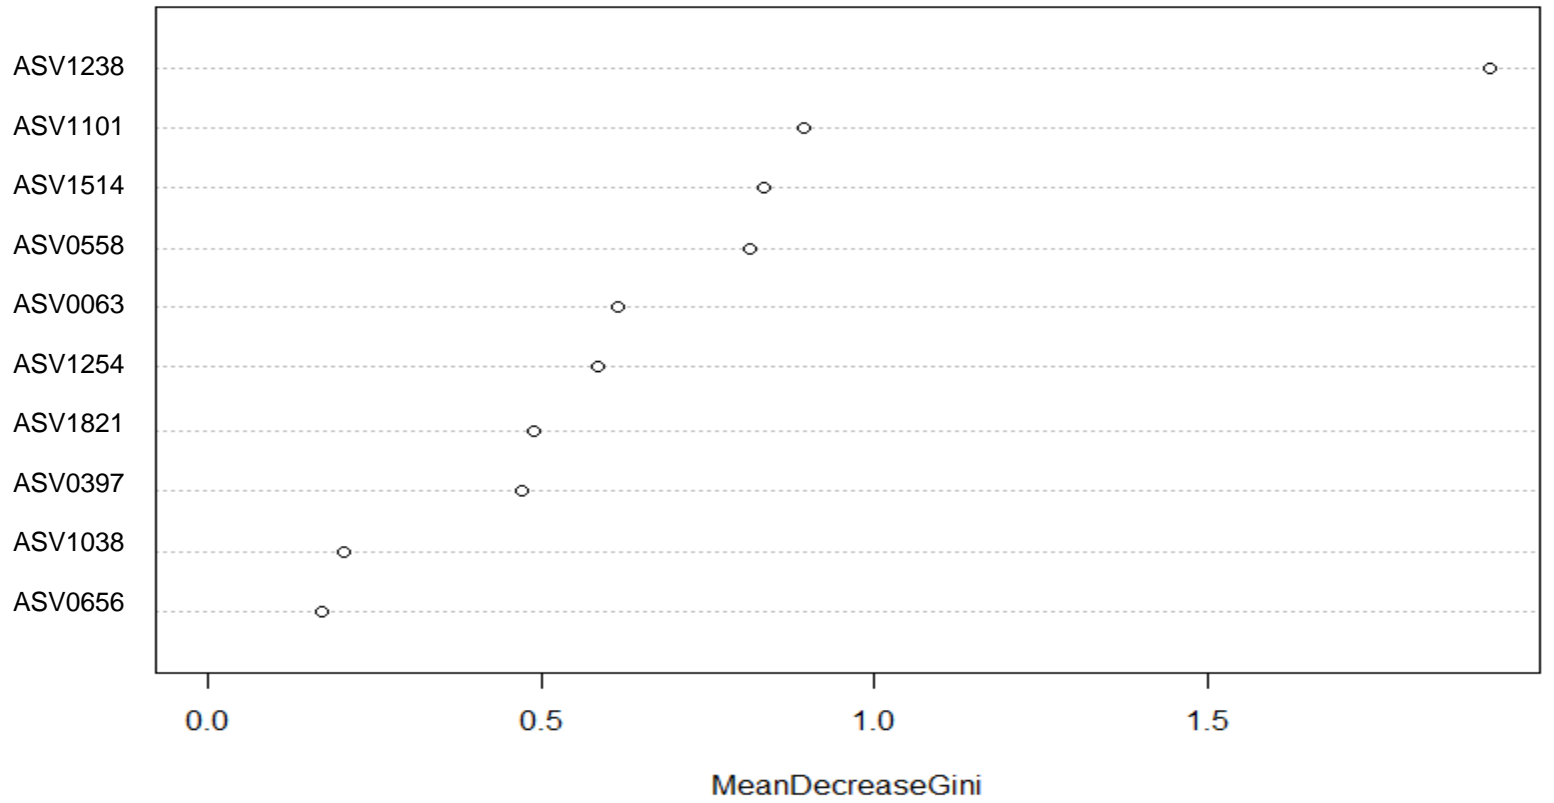

# rf\_26d

ASV0247  
ASV0072  
ASV0154  
ASV0135  
ASV2106  
ASV1468  
ASV1206  
ASV0089  
ASV0558  
ASV0063  
ASV0659  
ASV1101  
ASV0582  
ASV0077  
ASV0406  
ASV1252  
ASV1117  
ASV1254  
ASV0621  
ASV1838  
ASV1754  
ASV0620  
ASV2149  
ASV0677  
ASV1208  
ASV0657  
ASV1149

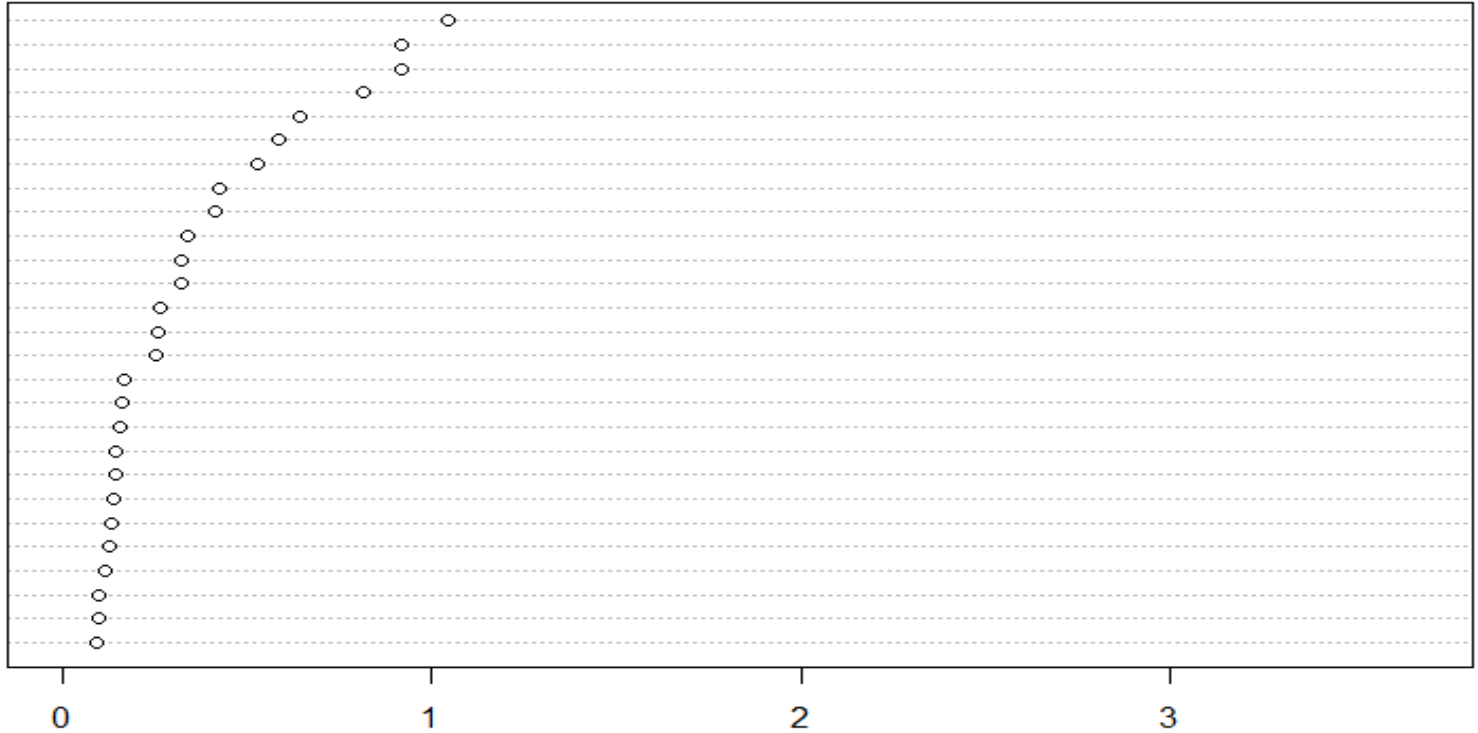

MeanDecreaseGini
