# Supplementary material for: Marine probiotics: increasing coral resistance to bleaching through microbiome manipulation
Source: PubMed Central journal article supplement (PMC6461899; doi:10.1038/s41396-018-0323-6), 2018-12-05
Supplement: 41396_2018_323_MOESM11_ESM.pdf [file 41396_2018_323_MOESM11_ESM.pdf]

## Alphaproteobacteria

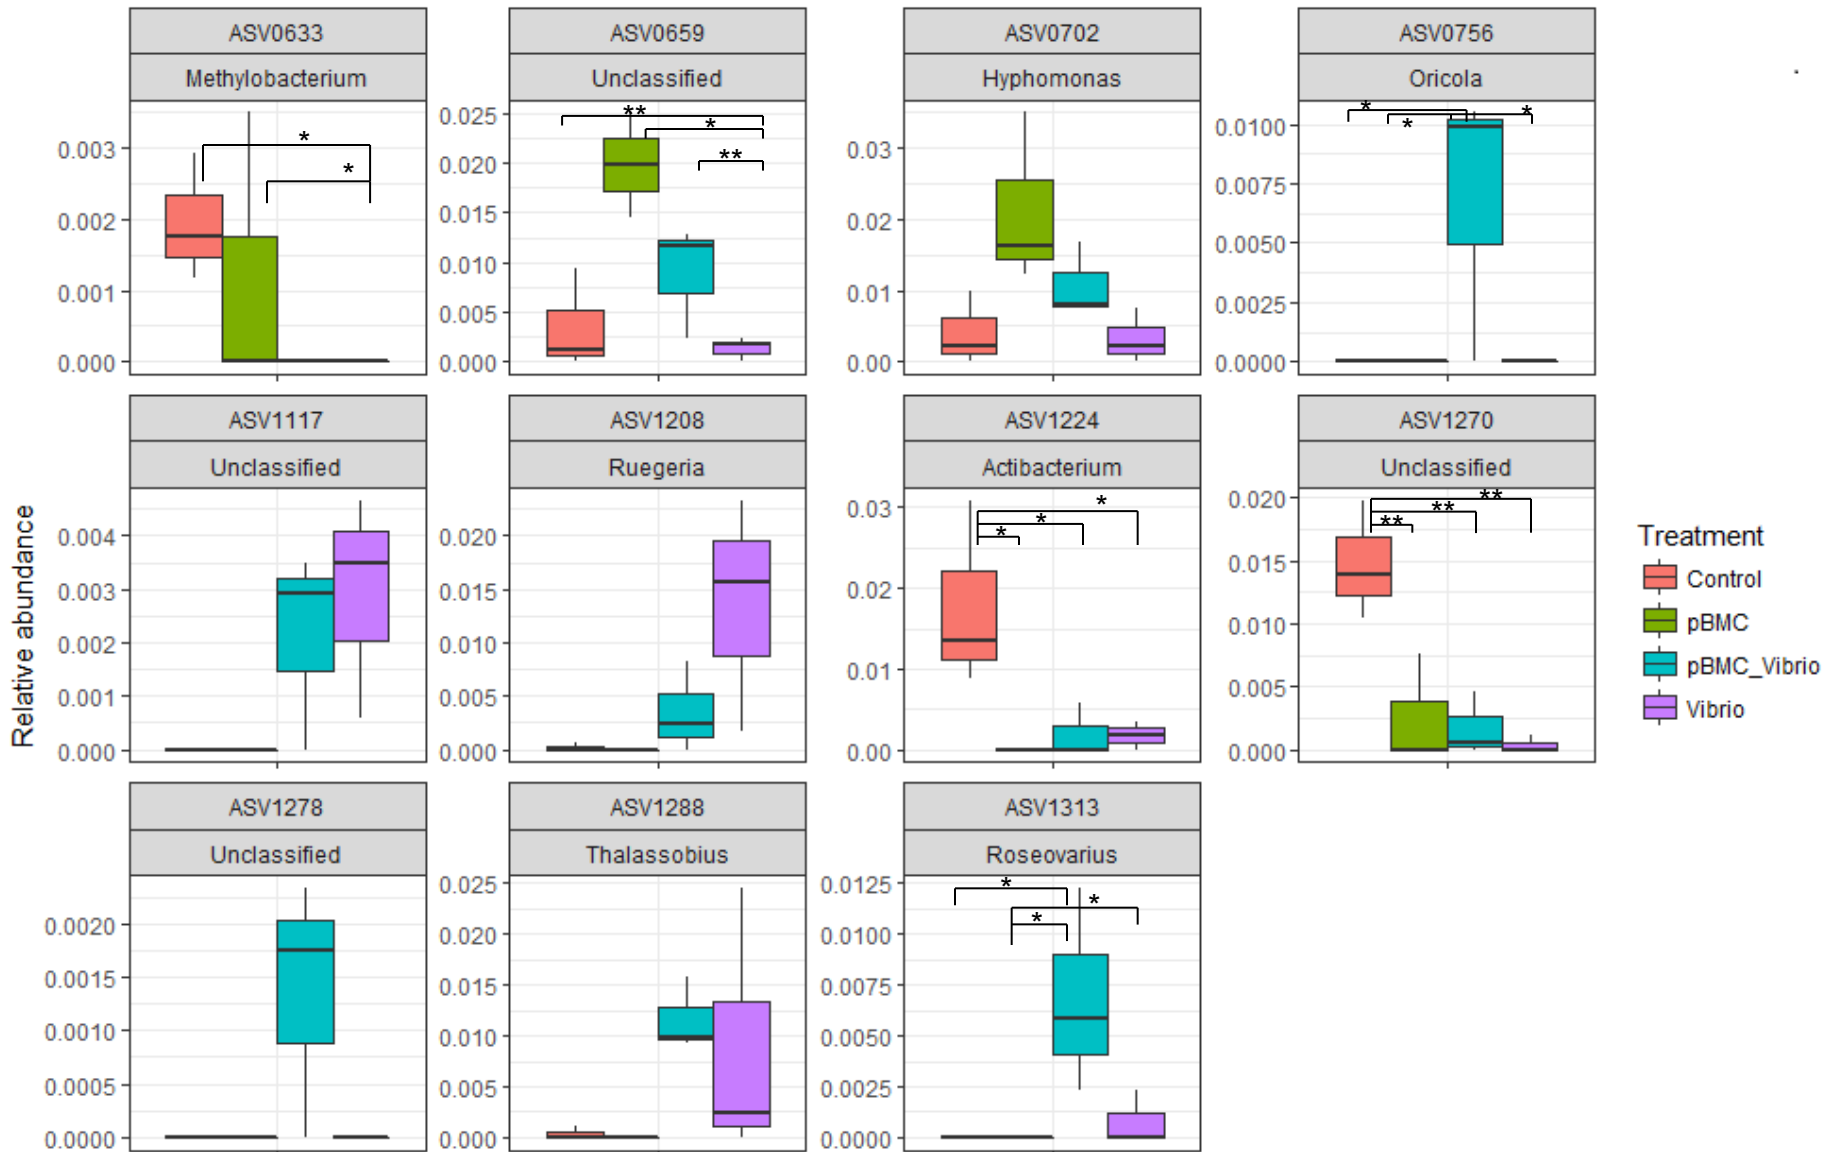

Significant differences of ASV relative abundances using a two way ANOVA with FDR multiple correction testing : \* P-value  $\leq 0.05$ , \*\* P-value  $\leq 0.01$ , \*\*\* P-value  $\leq 0.001$
