# Supplementary material for: Marine probiotics: increasing coral resistance to bleaching through microbiome manipulation
Source: PubMed Central journal article supplement (PMC6461899; doi:10.1038/s41396-018-0323-6), 2018-12-05
Supplement: 41396_2018_323_MOESM14_ESM.pdf [file 41396_2018_323_MOESM14_ESM.pdf]

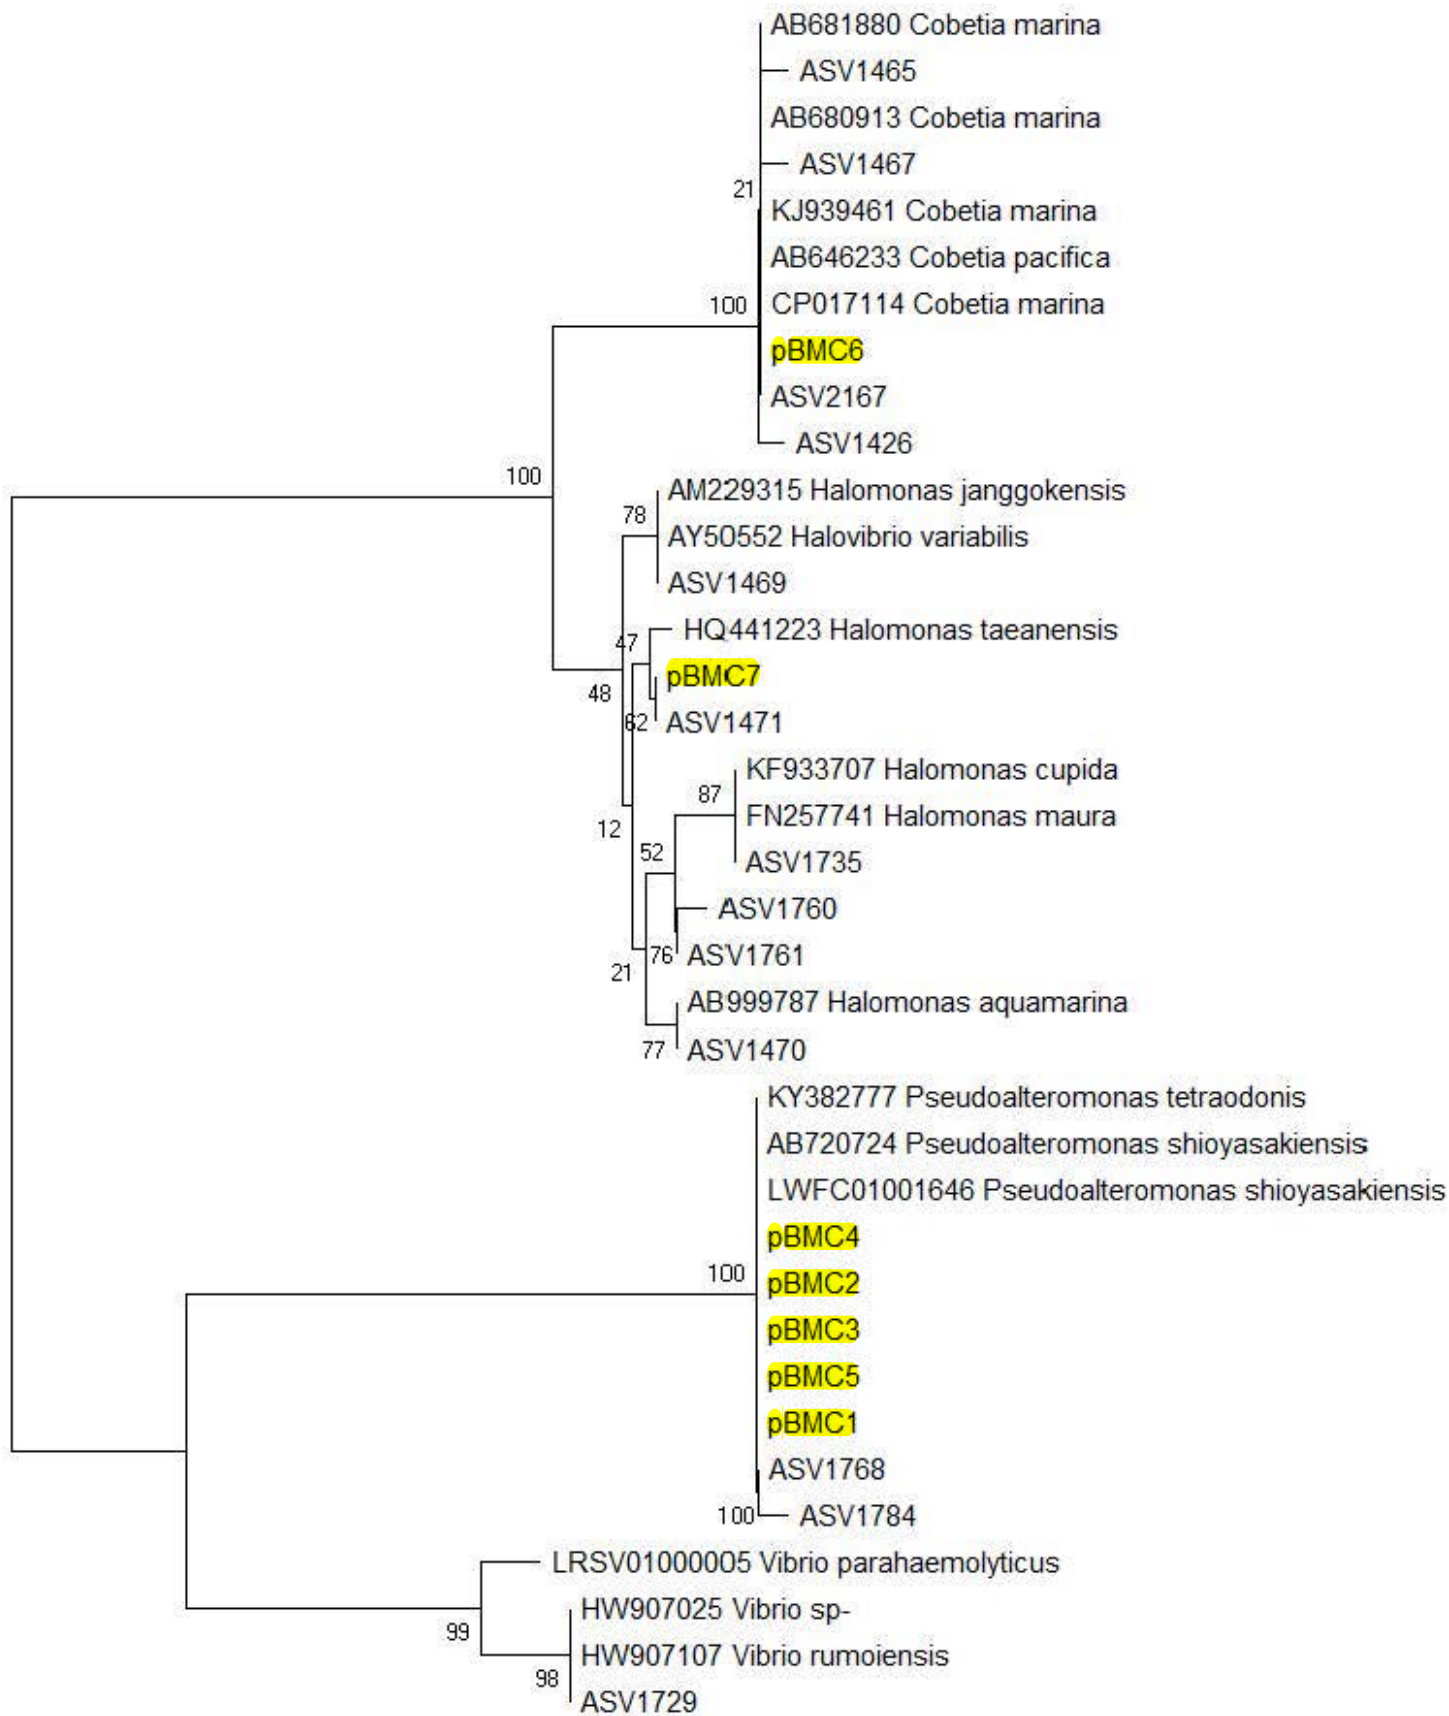

0.020

## pBMC 1-5

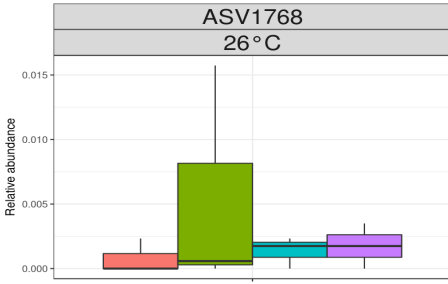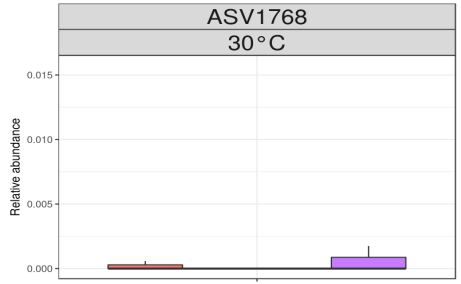

## pBMC 6

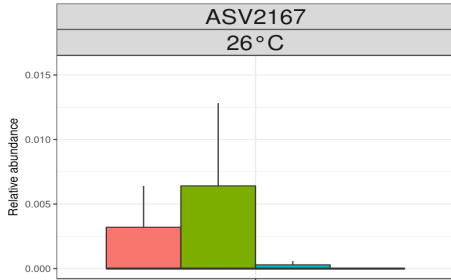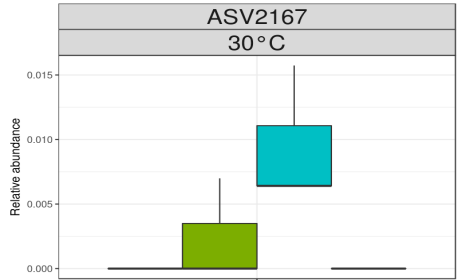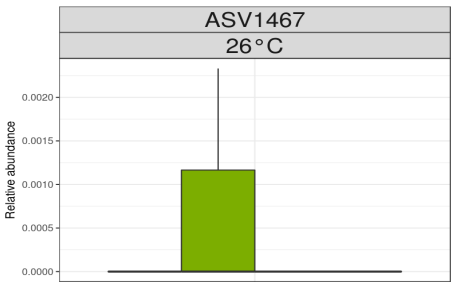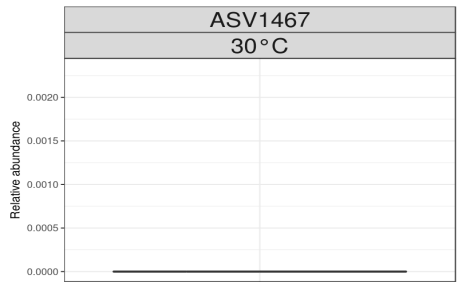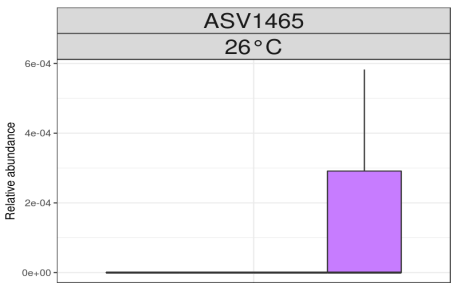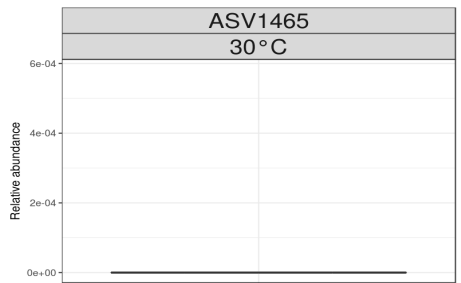

## pBMC 7

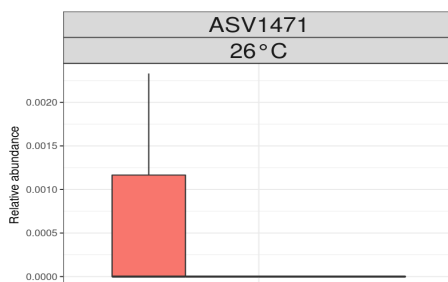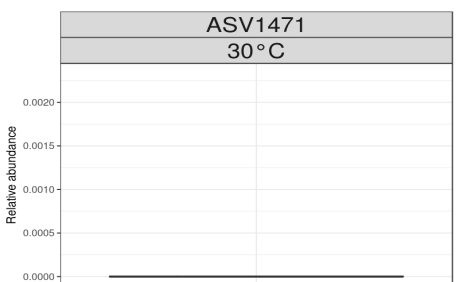

Treatment Control pBMC pBMC\_Vibrio Vibrio
