# Supplementary material for: Marine probiotics: increasing coral resistance to bleaching through microbiome manipulation
Source: PubMed Central journal article supplement (PMC6461899; doi:10.1038/s41396-018-0323-6), 2018-12-05
Supplement: 41396_2018_323_MOESM15_ESM.pdf [file 41396_2018_323_MOESM15_ESM.pdf]

**Supplementary Table S1.** Selected *Pocillopora damicornis* pBMC strains obtained by pBMC-PCR screening and strain typing by 16S phylogenetic results.

| Strain        | 16S rRNA gene identification                                | Identity | <i>nifH</i> | Catalase | <i>nirK</i> | <i>dmdA</i> | Antagonistic activity* |
|---------------|-------------------------------------------------------------|----------|-------------|----------|-------------|-------------|------------------------|
| <b>pBMC 1</b> | <i>Pseudoalteromonas</i> sp. ( <a href="#">KP016625.1</a> ) | 99%      |             | +++      | X           |             |                        |
| <b>pBMC 2</b> | <i>Pseudoalteromonas</i> sp. ( <a href="#">KU955357.1</a> ) | 100%     |             | +        | X           |             |                        |
| <b>pBMC 3</b> | <i>Pseudoalteromonas</i> sp. ( <a href="#">KX806641.1</a> ) | 100%     | X           | +        | X           |             |                        |
| <b>pBMC 4</b> | <i>Pseudoalteromonas</i> sp. ( <a href="#">KX806641.1</a> ) | 100%     |             | +++      |             | X           |                        |
| <b>pBMC 5</b> | <i>Pseudoalteromonas</i> sp. ( <a href="#">KU955357.1</a> ) | 99%      |             | +        | X           |             | X                      |
| <b>pBMC 6</b> | <i>Cobetia marina</i> ( <a href="#">KP236304.1</a> )        | 99%      |             | ++++     |             |             |                        |
| <b>pBMC 7</b> | <i>Halomonas taeanensis</i> ( <a href="#">KJ161492.1</a> )  | 100%     | X           | +        |             |             |                        |

\*Antagonist activity was measured against *V. corallilyticus* DSM19607, see Materials and Methods
