# Supplementary material for: Marine probiotics: increasing coral resistance to bleaching through microbiome manipulation
Source: PubMed Central journal article supplement (PMC6461899; doi:10.1038/s41396-018-0323-6), 2018-12-05
Supplement: 41396_2018_323_MOESM16_ESM.pdf [file 41396_2018_323_MOESM16_ESM.pdf]

**Supplementary Table S2.** Physical-chemical parameters of the water (average). Salinity, pH and dissolved oxygen (OD) were measured every two days (n = 3).

| <b>Treatments</b>     | <b>Salinity<br/>(ppt)</b> | <b>Dissolved Oxygen<br/>(mg/L)</b> | <b>pH</b>  |
|-----------------------|---------------------------|------------------------------------|------------|
| <b>Control 26°C</b>   | 34 - 35                   | 6.2 – 6.4                          | 8,05 – 8,1 |
| <b>pBMC 26°C</b>      | 34 - 35                   | 6.2 – 6.4                          | 8,05 – 8,1 |
| <b>pBMC + VC 26°C</b> | 34 - 35                   | 6.2 – 6.4                          | 8,05 – 8,1 |
| <b>VC 26°C</b>        | 34 - 35                   | 6.2 – 6.4                          | 8,05 – 8,1 |
| <b>Control 30°C</b>   | 34 - 35                   | 5.7 - 6                            | 8,05 – 8,1 |
| <b>pBMC 30°C</b>      | 34 - 35                   | 5.7 - 6                            | 8,05 – 8,1 |
| <b>pBMC + VC 30°C</b> | 34 - 35                   | 5.7 - 6                            | 8,05 – 8,1 |
| <b>VC 30°C</b>        | 34 - 35                   | 5.7 - 6                            | 8,05 – 8,1 |
