# Supplementary material for: Marine probiotics: increasing coral resistance to bleaching through microbiome manipulation
Source: PubMed Central journal article supplement (PMC6461899; doi:10.1038/s41396-018-0323-6), 2018-12-05
Supplement: 41396_2018_323_MOESM18_ESM.pdf [file 41396_2018_323_MOESM18_ESM.pdf]

**Supplementary Table S4.** Variance of rarefied ASV relative abundances of the control samples collected on days 1, 9 and 26 days at 26 and 30° Celsius determined by multivariate permutation analysis<sup>a</sup>.

| <b>Group interactions</b> | <b>P-value</b> | <b>Residuals</b> |
|---------------------------|----------------|------------------|
| <b>Temperature</b>        | 0.092907       |                  |
| <b>Days</b>               | 0.000999*      | 0.58689          |
| <b>Temperature:Days</b>   | 0.287712       |                  |

\* Statistically significant differences in sample's relative abundance (p-value  $\leq 0.05$ ).

<sup>a</sup> Multivariate permutation analysis performed by "adonis" function in "vegan" R package using 1000 permutations.
